# Supplementary material
Source: PubMed Central journal article supplement (PMC3502944)
Supplement: JCM.00918-12_zjm999092130so1.pdf [file JCM.00918-12_zjm999092130so1.pdf]

**Table S1. Demographic characteristics of the historical cohort of 344 pregnant women who seroconverted for *Toxoplasma gondii* during pregnancy and underwent amniocentesis for molecular detection of congenital toxoplasmosis**

| <b>Maternal age (year)</b>         |       |
|------------------------------------|-------|
| Mean                               | 28    |
| Median                             | 28    |
| Standard deviation                 | 5.4   |
| Range                              | 17-41 |
| <b>Characteristics of children</b> |       |
| Female                             | 168   |
| Male                               | 176   |
| Sex ratio                          | 1,05  |
| Twins                              | 3     |

**Table S2. Distribution of cases and clinical forms of congenital toxoplasmosis, overall and by dates of maternal infection**

| Date of maternal infection | Nb         | Lost to F-up |           | Nb with F-up | Congenital Toxoplasmosis |          |           | MTP/ IUFD* | Clinical form       |          |           |                   |          |           |          |          |          |          |
|----------------------------|------------|--------------|-----------|--------------|--------------------------|----------|-----------|------------|---------------------|----------|-----------|-------------------|----------|-----------|----------|----------|----------|----------|
|                            |            | Nb           | %         |              | Total                    | PND      |           |            | Symptomatic forms * |          |           | Subclinical forms |          |           | Unknown  |          |          |          |
|                            |            |              |           |              |                          | Neg      | Pos       |            | Total               | PND      |           | Total             | PND      |           | Total    | PND      |          |          |
|                            |            |              |           |              |                          |          |           |            |                     | Neg      | Pos       |                   | Neg      | Pos       |          | Neg      | Pos      |          |
| 0-6 WA                     | 81         | 16           | 20        | 65           | 2                        | 0        | 2         | 2          | 2                   | 0        | 2         | 0                 | 0        | 0         | 0        | 0        | 0        | 0        |
| 7-15 WA                    | 108        | 19           | 18        | 89           | 9                        | 1        | 8         | 6          | 4                   | 0        | 4         | 3                 | 1        | 2         | 2        | 0        | 0        | 2        |
| 16-28 WA                   | 122        | 8            | 7         | 114          | 27                       | 6        | 21        | 6          | 11                  | 0        | 11        | 15                | 6        | 9         | 1        | 0        | 0        | 1        |
| >29 WA                     | 25         | 2            | 8         | 23           | 12                       | 0        | 12        | 0          | 0                   | 0        | 0         | 12                | 0        | 12        | 0        | 0        | 0        | 0        |
| Imprecise                  | 8          | 1            | 13        | 7            | 1                        | 0        | 1         | 0          | 0                   | 0        | 0         | 1                 | 0        | 1         | 0        | 0        | 0        | 0        |
| <b>All</b>                 | <b>344</b> | <b>19</b>    | <b>13</b> | <b>298</b>   | <b>51</b>                | <b>7</b> | <b>41</b> | <b>14</b>  | <b>17</b>           | <b>0</b> | <b>17</b> | <b>31</b>         | <b>7</b> | <b>24</b> | <b>3</b> | <b>0</b> | <b>0</b> | <b>3</b> |

WA: weeks of amenorrhea, Nb: number, F-up: follow-up, PND: prenatal diagnosis, Neg: negative, Pos: positive, MTP: medical termination of pregnancy, IUFD: intra-uterine fetal death. \* all these cases were PCR-positive on amniotic fluid.

**Table S3. Overall data: detailed comparison of all biological results in the entire cohort (n=344)**

|                                             | Date of maternal infection | AF                                            | Placenta                                                  |                                                            | Cord blood                                                               |                                                           | Neonatal serology                                            |                                               |                                                | Commentaries with respect to postnatal follow-up      |
|---------------------------------------------|----------------------------|-----------------------------------------------|-----------------------------------------------------------|------------------------------------------------------------|--------------------------------------------------------------------------|-----------------------------------------------------------|--------------------------------------------------------------|-----------------------------------------------|------------------------------------------------|-------------------------------------------------------|
|                                             |                            | MI                                            | PCR                                                       | MI                                                         | PCR                                                                      | MI                                                        | IC (IgG)                                                     | Ig M                                          | IgA                                            |                                                       |
| Congenital toxoplasmosis pos PND Pos (n=44) | 0-6 WA (n=2)               | <b>Pos 1</b><br>Nd 1                          | Pos 1<br>Nd 1 <sup>a</sup>                                | Pos 1<br>Nd 1 <sup>a</sup>                                 | <b>Pos 1</b><br>Nd 1 <sup>a</sup>                                        | Nd 2 <sup>b</sup>                                         | NA 2                                                         | NA 2                                          | NA 2                                           | No follow-up: MTP/IUFD                                |
|                                             | 7-15 WA (n=8)              | <b>Pos 2</b><br>Neg 3<br>Nd 3                 | Pos 3<br>Nd 5 <sup>a</sup>                                | Pos 3<br>Nd 5 <sup>a</sup>                                 | <b>Pos 1</b><br>Nd 7 <sup>c</sup>                                        | <b>Pos 1</b><br>Neg 1<br>Nd 6 <sup>a</sup>                | Neg 1<br>Nd 1<br>NA 6                                        | <b>Pos 1</b><br>Neg 1<br>NA : 6               | Neg 2<br>NA 6                                  | No loss to follow-up                                  |
|                                             | 16-28 WA (n=21)            | <b>Pos 3</b><br>Neg 5<br>Nd 13                | Pos 14<br>Neg 2<br>Nd 5 <sup>a</sup>                      | Pos 12<br>Neg 5<br>Nd 4 <sup>a</sup>                       | <b>Pos 1</b><br>Neg 12<br>Nd 8 <sup>c</sup>                              | Neg 13<br>Nd 8                                            | <b>Pos 3</b><br>Neg 11<br>Nd 1<br>NA 6                       | <b>Pos 9</b><br>Neg 6<br>NA : 6               | <b>Pos 9</b><br>Neg 6<br>NA 6                  | No loss to follow-up                                  |
|                                             | > 29 WA (n=12)             | <b>Pos 2</b><br>Neg 2<br>Nd 8                 | Pos 7<br>Neg 4<br>Nd 1                                    | Pos 7<br>Neg 5<br>Nd 0                                     | <b>Pos 2</b><br>Neg 8<br>NI 1<br>Nd 1                                    | Neg 10<br>Nd 2                                            | <b>Pos 1</b><br>Neg 11                                       | <b>Pos 10</b><br>Neg 2                        | <b>Pos 8</b><br>Neg 4                          | No loss to follow-up                                  |
|                                             | Imprecise (n=1)            | Nd                                            | Pos                                                       | Pos                                                        | Neg                                                                      | Neg                                                       | Neg                                                          | Pos                                           | Pos                                            | No loss to follow-up                                  |
|                                             | <i>Total (n=44)</i>        | <i>Pos 8</i><br><i>Neg 10</i><br><i>Nd 26</i> | <i>Pos 26</i><br><i>Neg 6</i><br><i>Nd 12<sup>a</sup></i> | <i>Pos 24</i><br><i>Neg 10</i><br><i>Nd 10<sup>a</sup></i> | <i>Pos 5</i><br><i>Neg 21</i><br><i>NI 1</i><br><i>Nd 17<sup>d</sup></i> | <i>Pos 1</i><br><i>Neg 25</i><br><i>Nd 18<sup>d</sup></i> | <i>Pos 4</i><br><i>Neg 24</i><br><i>Nd 2</i><br><i>NA 14</i> | <i>Pos 21</i><br><i>Neg 9</i><br><i>NA 14</i> | <i>Pos 18</i><br><i>Neg 12</i><br><i>NA 14</i> | <i>No loss to follow-up</i>                           |
| Congenital toxoplasmosis pos PND neg (n=7)  | 0-6 WA (n=0)               | 0                                             | 0                                                         | 0                                                          | 0                                                                        | 0                                                         | 0                                                            | 0                                             | 0                                              |                                                       |
|                                             | 7-15 WA (n=1)              | Nd                                            | Pos                                                       | Neg                                                        | Neg                                                                      | Neg                                                       | Neg                                                          | Neg                                           | Neg                                            | Delayed diagnosis on the basis of serologic follow-up |
|                                             | 16-28 WA (n=6)             | Neg 3<br>Nd 3                                 | Pos 4<br>Neg 2                                            | Pos 5<br>Neg 1                                             | <b>Pos 2</b><br>Neg 3<br>Nd 1                                            | <b>Pos 2</b><br>Neg 4                                     | <b>Pos 2</b><br>Neg 4                                        | <b>Pos 3</b><br>Neg 3                         | <b>Pos 4</b><br>Neg 2                          | No loss to follow-up                                  |
|                                             | > 29 WA (n=0)              | 0                                             | 0                                                         | 0                                                          | 0                                                                        | 0                                                         | 0                                                            | 0                                             | 0                                              |                                                       |
|                                             | Imprecise (n=0)            | 0                                             | 0                                                         | 0                                                          | 0                                                                        | 0                                                         | 0                                                            | 0                                             | 0                                              |                                                       |
|                                             | <i>Total (n=7)</i>         | <i>Neg 3</i><br><i>Nd 4</i>                   | <i>Pos 5</i><br><i>Neg 2</i>                              | <i>Pos 5</i><br><i>Neg 2</i>                               | <i>Pos 2</i><br><i>Neg 4</i><br><i>Nd 1</i>                              | <i>Pos 2</i><br><i>Neg 5</i>                              | <i>Pos 2</i><br><i>Neg 5</i>                                 | <i>Pos 3</i><br><i>Neg 4</i>                  | <i>Pos 4</i><br><i>Neg 3</i>                   | <i>No loss to follow-up</i>                           |

|                                                                                                                                 |                                     |                                                          |                                                          |                                                          |                                                 |                                                |                                                 |                                                 |                                                                                          |                                                          |
|---------------------------------------------------------------------------------------------------------------------------------|-------------------------------------|----------------------------------------------------------|----------------------------------------------------------|----------------------------------------------------------|-------------------------------------------------|------------------------------------------------|-------------------------------------------------|-------------------------------------------------|------------------------------------------------------------------------------------------|----------------------------------------------------------|
| Congenital toxoplasmosis neg PND neg (N=293)<br>(220 'not infected', 27 'unlikely fetal infection'<br>and 46 lost to follow-up) | 0-6 WA<br>(n=79)                    | Neg 34<br>Nd 45                                          | Pos 3<br>Neg 52<br>NI 1<br>Nd 23 <sup>f</sup>            | Pos 1<br>Neg 63<br>Nd 15 <sup>f</sup>                    | Neg 44<br>Nd 35 <sup>f</sup>                    | Neg 47<br>Nd 32 <sup>f</sup>                   | Neg 63<br>Nd 16 <sup>f</sup>                    | Neg 68<br>Nd 11 <sup>f</sup>                    | Neg 64<br>Nd 15 <sup>f</sup>                                                             | Neg 63 (9)<br>Lost to follow-up 16 <sup>f</sup>          |
|                                                                                                                                 | 7-15 WA<br>(n=99)                   | Neg 33<br>Nd 66                                          | Pos 4<br>Neg 81<br>Nd 14 <sup>f</sup>                    | Neg 86<br>Nd 13 <sup>f</sup>                             | Neg 69<br>Nd 30 <sup>f</sup>                    | Neg 67<br>Nd 32 <sup>f</sup>                   | Neg 84<br>Nd 15 <sup>f</sup>                    | Neg 88<br>Nd 11 <sup>f</sup>                    | Neg 86<br>Nd 13 <sup>f</sup>                                                             | Neg 80 (10)<br>Lost to follow-up 19 <sup>f</sup>         |
|                                                                                                                                 | 16-28 WA<br>(n=95)                  | Neg 40<br>Nd 55                                          | Pos 8<br>Neg 61<br>Nd 26 <sup>g</sup>                    | Pos 2<br>Neg 69<br>Nd 24 <sup>g</sup>                    | Neg 59<br>Nd 36 <sup>g</sup>                    | Neg 59<br>Nd 36 <sup>g</sup>                   | Neg 75<br>Nd 20 <sup>g</sup>                    | Neg 82<br>Nd 13 <sup>g</sup>                    | Neg 78<br>Nd 17 <sup>g</sup>                                                             | Neg 87 (7)<br>Lost to follow-up 8 <sup>g</sup>           |
|                                                                                                                                 | > 29 WA<br>(n=13)                   | Neg 3<br>Nd 10                                           | Pos 1<br>Neg 11<br>Nd 1                                  | Neg 13                                                   | Neg 8<br>Nd 5                                   | Neg 8<br>Nd 5                                  | Neg 12<br>Nd 1                                  | Neg 12<br>Nd 1                                  | Neg 12<br>Nd 1                                                                           | Neg 11<br>Lost to follow-up 2                            |
|                                                                                                                                 | Imprecise (n=7)                     | Neg 6<br>Nd 1                                            | Neg 4<br>NI 1<br>Nd 2 <sup>h</sup>                       | Neg 5<br>Nd 2 <sup>h</sup>                               | Neg 3<br>Nd 4 <sup>h</sup>                      | Neg 5<br>Nd 2 <sup>h</sup>                     | Neg 6<br>Nd 1 <sup>h</sup>                      | Neg 6<br>Nd 1 <sup>h</sup>                      | Neg 6<br>Nd 1 <sup>h</sup>                                                               | Neg 6 (1)<br>Lost to follow-up 1 <sup>h</sup>            |
|                                                                                                                                 | <i>Total (n=293)</i>                | <i>Neg 116<br/>Nd 177</i>                                | <i>Pos 16<br/>Neg 209<br/>NI 2<br/>Nd 66<sup>i</sup></i> | <i>Pos 3<br/>Neg 236<br/>Nd 54<sup>i</sup></i>           | <i>Neg 183<br/>Nd 110<sup>i</sup></i>           | <i>Neg 186<br/>Nd 107<sup>i</sup></i>          | <i>Neg 240<br/>Nd 53<sup>i</sup></i>            | <i>Neg 256<br/>Nd 37<sup>i</sup></i>            | <i>Neg 246<br/>Nd 47<sup>i</sup></i>                                                     | <i>Neg 247 (27)<br/>Lost to follow-up 46<sup>i</sup></i> |
| <b>All (n=344)</b>                                                                                                              | <b>Pos 8<br/>Neg 129<br/>Nd 207</b> | <b>Pos 47<br/>Neg 217<br/>NI 2<br/>Nd 78<sup>i</sup></b> | <b>Pos 32<br/>Neg 248<br/>Nd 64<sup>i</sup></b>          | <b>Pos 7<br/>Neg 208<br/>NI 1<br/>Nd 128<sup>i</sup></b> | <b>Pos 3<br/>Neg 216<br/>Nd 125<sup>i</sup></b> | <b>Pos 6<br/>Neg 269<br/>Nd 69<sup>i</sup></b> | <b>Pos 23<br/>Neg 254<br/>Nd 67<sup>i</sup></b> | <b>Pos 22<br/>Neg 255<br/>Nd 67<sup>i</sup></b> | <b>Congenital toxoplasmosis 51<br/>Neg 247 (27)<br/>Lost to follow-up 46<sup>i</sup></b> |                                                          |

PND: prenatal diagnosis, AF: amniotic fluid, MI: mouse inoculation, IC: immune charge, MTP: medical termination of pregnancy, IUFD: intra-uterine fetal death, WA: week of amenorrhea, Pos: positive, Neg: negative, Nd: not done, indeed, depending on the date of maternal infection and on the high/poor quality of the maternal, hence neonatal and pediatric, follow-up, certain tests were not performed. NA: not applicable due to fetal loss (MTP and/or IUFD), NI: non interpretable. In the follow-up column, Neg means IgG titers undetectable, using screening methods, during the first year of life; rare cases of almost complete negativity (titers < 5 UI/mL) are indicated into brackets (see Materials and Methods). The figures in the columns indicate the number of cases. Results that affirmed the diagnosis of congenital toxoplasmosis are shown in bold. With respect to the analyses that were not performed (Nd) and the follow-up (last column): <sup>a</sup> all were IUFD/MTP, <sup>b</sup> one was IUFD/MTP, <sup>c</sup> six of them were IUFD/MTP, <sup>d</sup> 14 were IUFD/MTP; follow-up was lost during pregnancy for six <sup>f</sup>, three <sup>g</sup>, one <sup>h</sup> and 16 <sup>i</sup> cases.

**Table S4: Three by three tables of results of cord blood and placental PCR tests in case of positive and negative PND**

|               |          | Positive PND      |          |                    | Negative PND      |          |          |
|---------------|----------|-------------------|----------|--------------------|-------------------|----------|----------|
|               |          | PCR on cord blood |          |                    | PCR on cord blood |          |          |
|               |          | Positive          | Negative | Not done           | Positive          | Negative | Not done |
| Placental PCR | Positive | <b>5</b>          | 17       | 4                  | <b>2</b>          | 17       | 2        |
|               | Negative | 0                 | 5        | 0                  | 0                 | 165      | 46       |
|               | Not done | 0                 | 1        | 12<br>(9 MTP/IUFD) | 0                 | 5        | 63       |

PND: prenatal diagnosis, MTP/IUFD: medical termination of pregnancy / intra uterine fetal death. Only positive PCR result on AF and/or cord blood (in bold) are considered to allow affirming the diagnosis of congenital toxoplasmosis.
